# Supplementary material
Source: PubMed Central journal article supplement (PMC3136797)
Supplement: mmc1.pdf [file mmc1.pdf]

**Supporting Information for “Reengineering rate-limiting, millisecond enzyme motions by introduction of a unnatural amino acid”** by Watt, Rivalta, Whittier, Batista, and Loria

**Table S1.** Data for both sets was acquired at 298 K and 14.1T.  $R_2$  values were determined in a relaxation compensated CPMG with  $\tau_{cp} = 0.3125$  ms. Red residues indicate proline residues, blank spaces are unassigned or overlapped, and EB means exchange broadened. All data were obtained on  $^1\text{H}$ ,  $^{15}\text{N}$ -labeled RNase A.

| <u>Residue</u> | <u>WT pH = 6.4</u> | <u>error</u> | <u>WT pH = 7.0</u> | <u>error</u> | <u>H48C-4MI pH = 6.4</u> | <u>error</u> | <u>H48C-4MI pH = 7.0</u> | <u>error</u> |
|----------------|--------------------|--------------|--------------------|--------------|--------------------------|--------------|--------------------------|--------------|
| 3              | 15.14              | 0.11         | 15.85              | 0.06         |                          |              |                          |              |
| 4              | 20.88              | 0.17         | 16.93              | 0.07         |                          |              |                          |              |
| 5              | 14.90              | 0.10         | 16.06              | 0.05         | 14.31                    | 1.12         | 16.25                    | 0.51         |
| 6              | 14.95              | 0.09         | 15.13              | 0.05         | 13.11                    | 0.99         | 16.11                    | 0.46         |
| 7              | 15.87              | 0.09         | 16.28              | 0.04         | 12.60                    | 1.58         | 17.48                    | 0.67         |
| 8              | 15.76              | 0.11         | 16.13              | 0.06         | 14.57                    | 1.04         | 16.87                    | 0.53         |
| 9              | 15.36              | 0.11         | 15.70              | 0.04         | 14.38                    | 1.28         | 17.23                    | 0.55         |
| 10             | 15.80              | 0.12         | 16.22              | 0.06         | 12.64                    | 1.51         | 17.22                    | 0.64         |
| 11             | 15.87              | 0.15         | 15.88              | 0.07         | 19.60                    | 3.00         | 17.14                    | 1.03         |
| 12             | 14.79              | 0.15         | 14.60              | 0.07         | EB                       |              | 16.13                    | 1.18         |
| 13             | 14.67              | 0.13         | 14.51              | 0.07         | EB                       |              | 14.53                    | 1.21         |
| 14             | 15.04              | 0.15         | 15.19              | 0.07         | EB                       |              | 15.73                    | 3.08         |
| 15             | 17.27              | 0.25         | 19.77              | 0.12         | EB                       |              | 13.85                    | 2.74         |
| 16             | 15.11              | 0.15         | 17.50              | 0.08         | EB                       |              | 12.35                    | 2.26         |
| 17             | 22.04              | 0.42         | 24.10              | 0.17         | EB                       |              | 15.81                    | 2.15         |
| 18             | 15.14              | 0.11         | 15.85              | 0.06         | EB                       |              | 14.22                    | 2.74         |
| 19             | 14.95              | 0.11         | 19.67              | 0.09         | EB                       |              | 17.62                    | 3.08         |
| 20             | EB                 |              | EB                 |              | 13.11                    | 0.99         | 15.01                    | 1.66         |
| 21             | EB                 |              | EB                 |              | 18.56                    | 2.02         | 16.10                    | 2.84         |
| 22             | 11.52              | 0.17         | 17.01              | 0.18         |                          |              |                          |              |
| 25             | 16.78              | 0.12         | 17.06              | 0.07         | EB                       |              | 18.81                    | 3.93         |
| 26             | 15.34              | 0.18         | 16.21              | 0.08         | EB                       |              | 14.27                    | 2.74         |
| 27             | 15.31              | 0.14         | 15.70              | 0.04         | EB                       |              | 16.16                    | 1.73         |
| 28             | 14.54              | 0.11         | 15.51              | 0.06         | 13.32                    | 3.25         | 16.28                    | 1.18         |
| 29             | 14.80              | 0.08         | 15.05              | 0.03         | 14.99                    | 1.03         | 15.21                    | 0.43         |
| 30             | 15.95              | 0.16         | 15.86              | 0.08         | 13.05                    | 3.38         | 17.26                    | 1.36         |
| 31             | 15.18              | 0.13         | 15.05              | 0.07         | 10.91                    | 2.72         | 15.88                    | 1.61         |
| 32             | 14.55              | 0.12         | 14.85              | 0.06         | 14.18                    | 2.31         | 15.92                    | 1.03         |
| 33             | 15.80              | 0.16         | 15.85              | 0.08         | 14.80                    | 3.15         | 16.94                    | 1.22         |
| 34             | 14.70              | 0.12         | 14.98              | 0.06         | 18.56                    | 2.02         | 15.47                    | 0.68         |
| 35             | 15.53              | 0.11         | 15.85              | 0.06         | 15.92                    | 1.32         | 17.86                    | 0.55         |
| 36             | 15.69              | 0.16         | 18.63              | 0.09         | 12.87                    | 2.22         | 17.96                    | 0.96         |
| 37             | 16.15              | 0.11         | 19.08              | 0.08         | 13.05                    | 1.93         | 18.22                    | 0.79         |
| 39             | 13.34              | 0.09         | 13.87              | 0.05         | 14.17                    | 1.26         | 13.68                    | 0.46         |
| 40             | 14.40              | 0.11         | 16.63              | 0.07         | 11.17                    | 1.31         | 16.69                    | 0.57         |
| 41             | 14.85              | 0.13         | 15.39              | 0.07         | 17.38                    | 3.07         | 15.27                    | 1.20         |
| <b>42</b>      |                    |              |                    |              |                          |              |                          |              |
| 43             | 12.27              | 0.10         | 11.31              | 0.05         | 11.13                    | 1.18         | 13.70                    | 0.60         |
| 44             | 14.01              | 0.12         | 14.28              | 0.06         | EB                       |              | 15.84                    | 0.51         |

|           |       |      |       |      |    |       |       |       |      |
|-----------|-------|------|-------|------|----|-------|-------|-------|------|
| 45        | 14.30 | 0.17 | 14.98 | 0.08 | EB |       | 13.70 | 1.89  |      |
| 46        | 16.75 | 0.34 | 16.34 | 0.12 | EB |       | EB    |       |      |
| 47        | 20.85 | 1.16 | 17.21 | 0.20 | EB |       | EB    |       |      |
| 48        | 15.34 | 0.14 | 16.96 | 0.22 | EB |       | EB    |       |      |
| 49        | 11.53 | 0.11 | 11.80 | 0.05 | EB |       | EB    |       |      |
| 50        | 14.72 | 0.13 | 14.51 | 0.06 |    | 11.53 | 3.08  | 14.16 | 1.16 |
| 51        | 15.64 | 0.11 | 27.85 | 0.17 |    | 15.36 | 2.48  | 17.27 | 0.94 |
| 52        | 14.29 | 0.08 | 15.13 | 0.05 |    | 13.58 | 1.26  | 15.84 | 0.51 |
| 53        | 14.51 | 0.10 | 15.13 | 0.04 |    | 16.62 | 1.93  | 15.58 | 0.67 |
| 54        | 15.19 | 0.11 | 15.07 | 0.06 | EB |       |       | 15.39 | 1.02 |
| 55        | 15.44 | 0.13 | 15.06 | 0.07 |    | 13.35 | 1.83  | 16.98 | 0.78 |
| 56        | 14.18 | 0.11 | 14.32 | 0.05 |    | 16.48 | 1.24  | 15.50 | 0.56 |
| 57        | 15.59 | 0.11 | 15.69 | 0.06 |    | 15.54 | 1.27  | 16.15 | 0.55 |
| 58        | 9.89  | 0.11 | 9.96  | 0.05 | EB |       |       | 11.76 | 0.53 |
| 59        | 13.55 | 0.13 | 12.89 | 0.06 |    | 15.21 | 1.39  | 15.25 | 0.56 |
| 60        | 14.91 | 0.16 | 14.77 | 0.08 |    | 16.95 | 1.63  | 15.93 | 0.70 |
| 61        | 15.71 | 0.15 | 15.96 | 0.08 |    | 14.17 | 1.55  | 16.93 | 0.69 |
| 62        | 15.34 | 0.14 | 16.56 | 0.07 |    | 13.32 | 1.21  | 16.65 | 0.59 |
| 63        | 14.98 | 0.09 | 15.25 | 0.05 |    | 13.38 | 0.86  | 22.33 | 3.38 |
| 64        | 13.02 | 0.11 | 13.23 | 0.05 |    | 12.97 | 0.90  | 13.76 | 0.45 |
| 65        | 14.73 | 0.16 | 15.14 | 0.08 |    | 14.67 | 1.71  | 16.47 | 0.73 |
| 66        | 15.67 | 0.97 | 17.76 | 0.42 | EB |       |       | EB    |      |
| 67        | 13.66 | 0.16 | 16.08 | 0.09 |    | 13.42 | 1.55  | 15.95 | 0.75 |
| 68        | 13.49 | 0.12 | 14.55 | 0.06 |    | 13.99 | 1.05  | 15.37 | 0.47 |
| 69        | 15.31 | 0.14 | 15.70 | 0.04 |    | 14.83 | 1.39  | 16.56 | 0.59 |
| 70        | 14.77 | 0.16 | 18.94 | 0.10 |    | 15.04 | 1.51  | 17.76 | 0.69 |
| 71        | 15.78 | 0.27 | 16.47 | 0.12 |    | 14.85 | 2.48  | 16.53 | 1.00 |
| 72        | 12.94 | 0.14 | 13.25 | 0.07 |    | 12.87 | 1.17  | 14.46 | 0.54 |
| 73        | 15.70 | 0.20 | 16.36 | 0.07 | EB |       |       | 16.82 | 0.75 |
| 74        | 16.34 | 0.22 | 17.15 | 0.10 |    | 17.96 | 2.05  | 18.38 | 0.92 |
| 75        | 16.39 | 0.18 | 16.46 | 0.09 |    | 17.17 | 2.18  | 18.35 | 0.93 |
| 76        | 18.51 | 0.16 | 27.85 | 0.17 |    | 16.05 | 1.65  | 15.00 | 0.72 |
| 77        | 13.49 | 0.11 | 13.51 | 0.06 |    | 10.83 | 1.81  | 14.39 | 0.67 |
| 78        | 16.39 | 0.12 | 19.42 | 0.08 |    | 13.85 | 1.89  | 17.19 | 0.68 |
| 79        | 15.03 | 0.15 | 15.30 | 0.07 |    | 11.40 | 2.84  | 17.14 | 0.86 |
| 80        | 16.01 | 0.18 | 15.62 | 0.09 |    | 22.38 | 27.95 | EB    |      |
| 82        | 27.36 | 1.07 | 20.09 | 0.18 | EB |       |       | 19.01 | 2.44 |
| 83        | 19.33 | 0.43 | 16.71 | 0.12 | EB |       |       | 18.62 | 2.62 |
| 84        | 15.23 | 0.15 | 15.19 | 0.08 |    | 15.96 | 3.59  | 16.68 | 1.11 |
| 85        | 14.98 | 0.09 | 15.25 | 0.05 |    | 13.38 | 0.86  | 16.42 | 0.43 |
| 86        | 15.21 | 0.14 | 15.82 | 0.07 |    | 14.05 | 2.37  | 16.18 | 1.06 |
| 87        | 15.79 | 0.11 | 15.83 | 0.06 |    |       |       |       |      |
| 90        | 14.62 | 0.09 | 15.28 | 0.05 |    | 13.00 | 1.10  | 15.23 | 0.44 |
| 91        | 13.16 | 0.08 | 14.14 | 0.05 |    | 12.56 | 1.00  | 14.80 | 0.41 |
| 92        | 31.33 | 0.63 | 55.45 | 8.41 | EB |       |       | EB    |      |
| <b>93</b> |       |      |       |      |    |       |       |       |      |
| 94        | 12.53 | 0.09 | 13.38 | 0.05 |    | 10.64 | 1.07  | 13.82 | 0.46 |
| 95        | 13.71 | 0.07 | 15.25 | 0.04 |    | 10.55 | 0.88  | 15.49 | 0.41 |
| 96        | 15.26 | 0.14 | 15.03 | 0.07 |    | 11.09 | 2.02  | 15.65 | 0.82 |

|            |       |      |       |      |       |      |       |      |
|------------|-------|------|-------|------|-------|------|-------|------|
| 97         | 14.73 | 0.15 | 14.54 | 0.07 | 11.64 | 2.28 | 16.65 | 1.31 |
| 98         | 15.65 | 0.16 | 15.95 | 0.08 | 21.71 | 3.67 | 14.46 | 1.49 |
| 99         | 17.70 | 0.16 | 21.04 | 0.11 | 15.96 | 4.52 | 19.69 | 2.62 |
| 100        | 15.40 | 0.15 | EB    |      | EB    |      | 17.85 | 1.86 |
| 101        | 22.23 | 0.50 | 20.10 | 0.14 | EB    |      | 18.66 | 3.54 |
| 103        | 17.36 | 0.17 | 15.05 | 0.03 | EB    |      | 17.05 | 1.18 |
| 104        | 14.57 | 0.18 | 13.91 | 0.08 |       |      |       |      |
| 105        | 15.94 | 0.20 |       |      | EB    |      | EB    |      |
| 106        | 16.73 | 0.19 | 17.04 | 0.09 | 11.40 | 3.08 | 18.04 | 1.10 |
| 107        | 15.92 | 0.16 | 16.46 | 0.09 | 15.70 | 1.49 | 17.71 | 0.70 |
| 108        | 16.62 | 0.21 | 16.95 | 0.10 | 12.41 | 1.87 | 17.80 | 0.87 |
| 109        | 15.87 | 0.09 | 16.28 | 0.04 | 12.51 | 3.08 | 17.14 | 0.86 |
| 110        | 14.21 | 0.16 | 14.80 | 0.08 | 13.29 | 1.55 | 16.03 | 0.68 |
| 111        | 14.80 | 0.08 | 15.05 | 0.03 | EB    |      | EB    |      |
| 112        | 13.31 | 0.13 | 14.05 | 0.06 | 13.52 | 1.13 | 14.55 | 0.52 |
| 113        | 11.90 | 0.08 | 14.58 | 0.05 | 12.59 | 0.90 | 13.95 | 0.40 |
| <b>114</b> |       |      |       |      |       |      |       |      |
| 115        | 15.40 | 0.10 | 15.00 | 0.06 | 13.24 | 0.94 | 15.39 | 0.48 |
| 116        | 14.53 | 0.13 | 15.00 | 0.06 | 14.02 | 1.30 | 15.67 | 0.60 |
| <b>117</b> |       |      |       |      |       |      |       |      |
| 118        | 17.32 | 0.24 | 17.38 | 0.11 | 14.91 | 2.48 | 17.53 | 1.12 |
| 119        | 13.71 | 0.07 | 15.25 | 0.04 | 19.61 | 2.95 | 18.81 | 0.96 |
| 120        | 22.30 | 0.34 | 21.44 | 0.15 | 17.66 | 6.14 | 20.56 | 1.81 |
| 121        | 17.13 | 0.29 | 17.59 | 0.14 | 12.41 | 4.75 | 17.96 | 1.86 |
| 122        | 14.17 | 0.22 | 14.04 | 0.11 | 11.09 | 3.08 | 14.10 | 1.32 |
| 123        | 13.50 | 0.11 | 14.95 | 0.06 | 10.81 | 1.33 | 15.57 | 0.55 |
| 124        | 14.44 | 0.13 | 27.85 | 0.17 | 16.05 | 1.65 | 29.74 | 1.76 |

Figure S1.

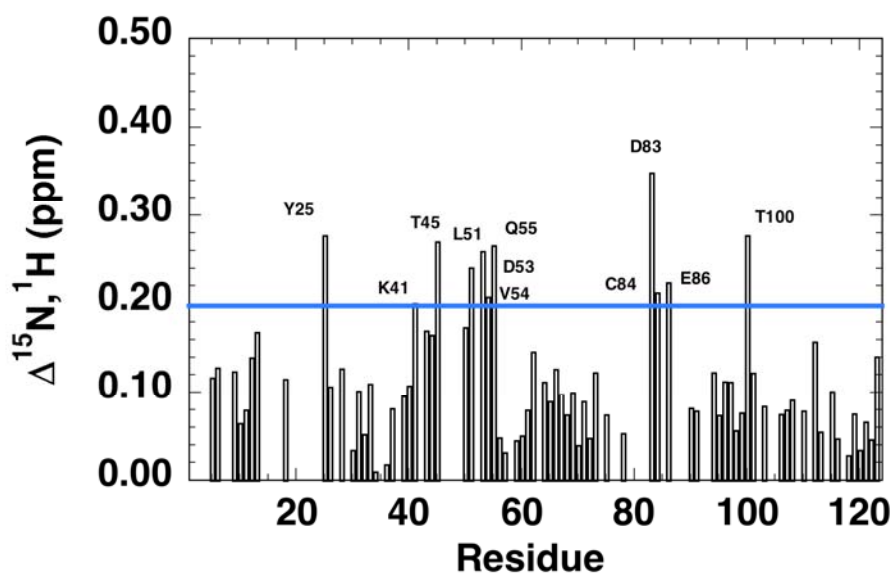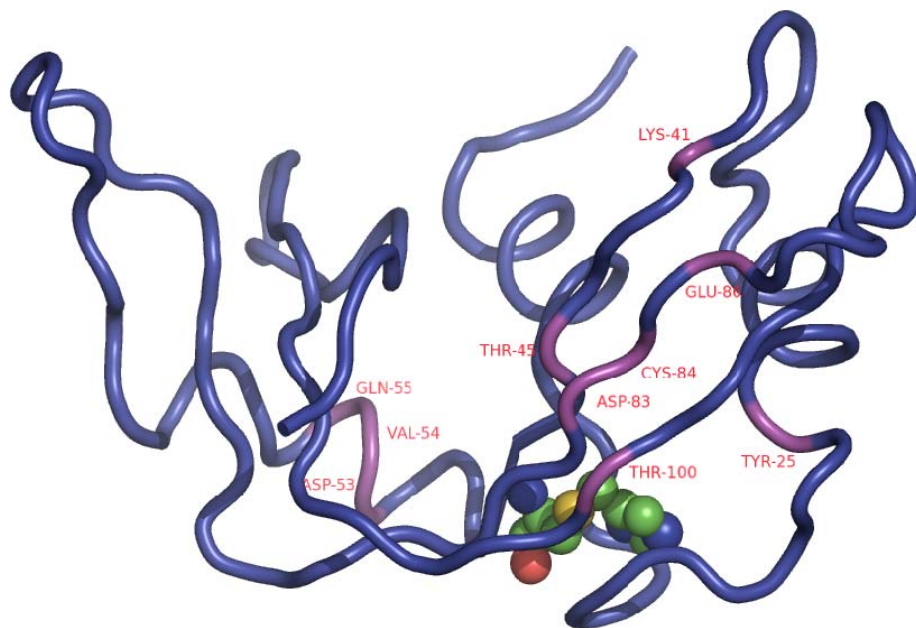

**Figure S1.** (top) Composite  $\Delta^{15}\text{N}, ^1\text{H} = \sqrt{\delta_N^2 / 25 + \delta_H^2}$  chemical shift changes for H48C-4MI. The blue line marks  $1.5\sigma$  above the standard deviation of the mean. Amino acid residues above this line are indicated by their one-letter amino acid code and are (bottom) mapped onto the RNase A ribbon structure in magenta. Unassigned loop 1 residues are shown in gray.

Figure S2.

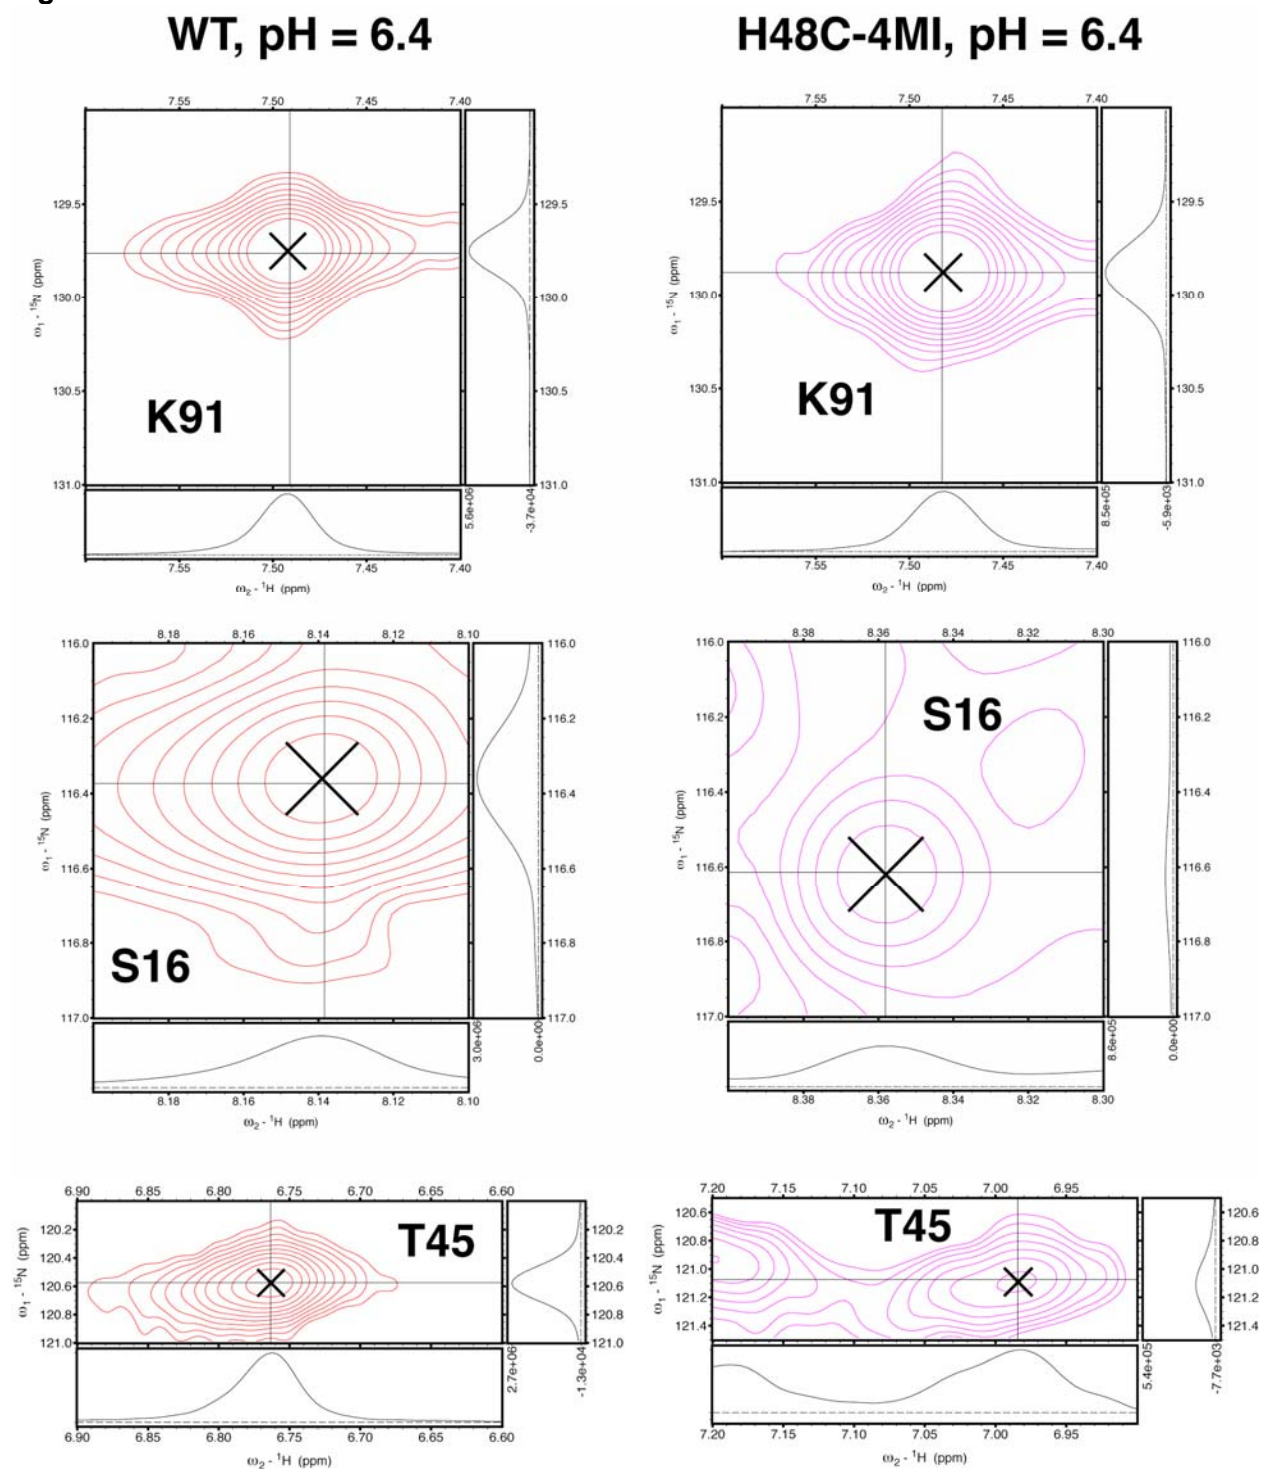

**Figure S2.** Contour plots for residues in (left) RNase A, pH = 6.4 and (right) H48C-4MI, pH = 6.4. K91 represents a residue in which the peak intensity is not affected in H48C-4MI relative to WT. S16 and T45 are residues in loop1 and beta-strand 1, respectively, in which significant exchange broadening occurs in the H48C-4MI enzyme. 1D slices with intensity ranges show the significant reduction in S/N for H48C-4MI residues. Data was identically acquired at 14.1 T and 298 K.

Figure S3.

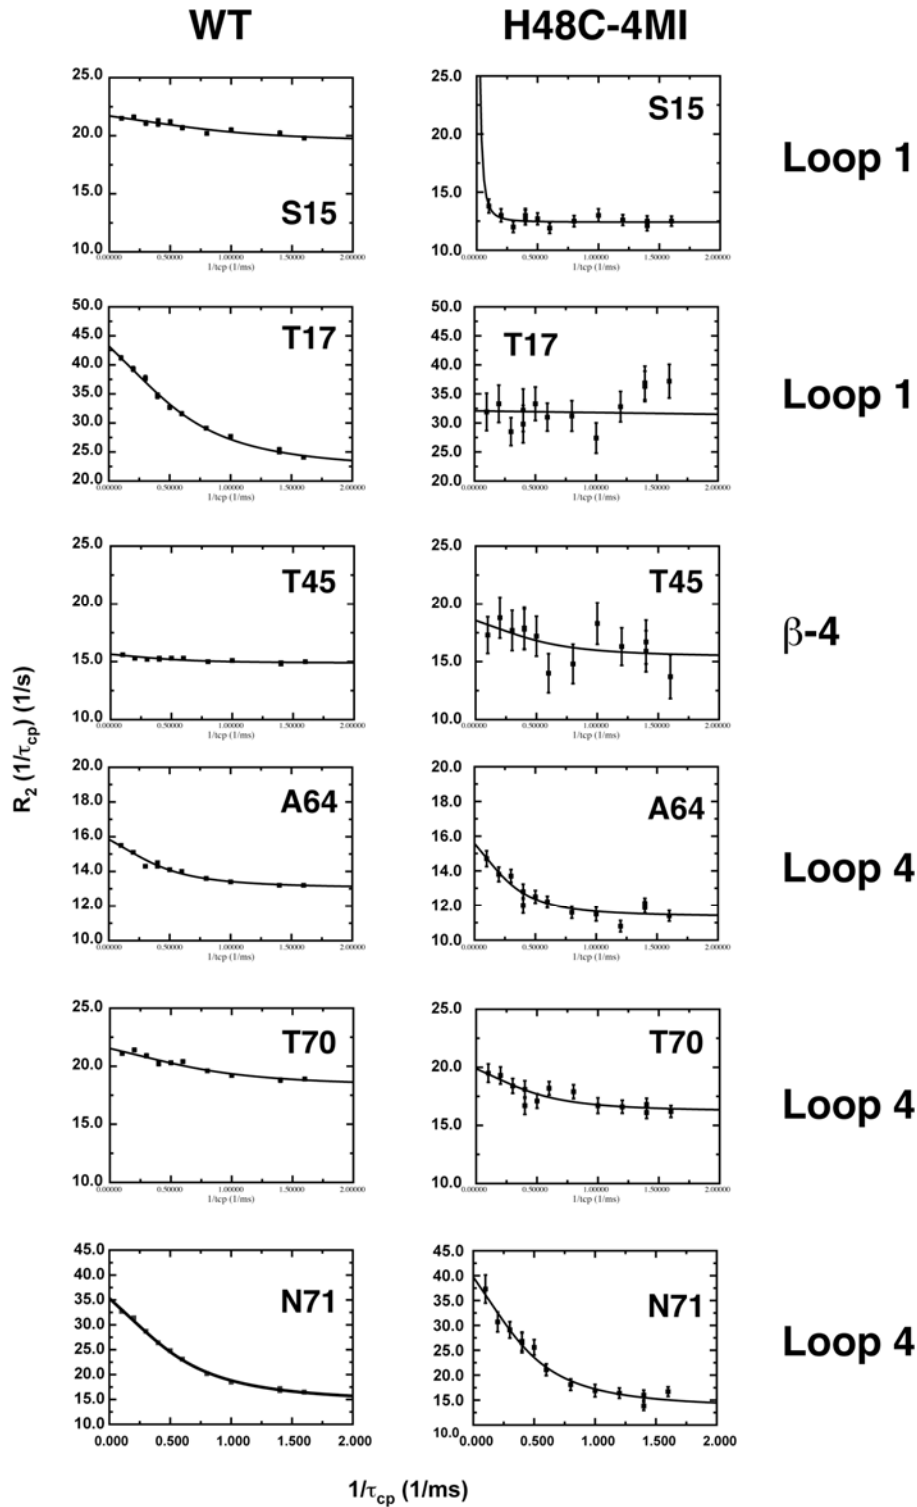

Figure S3. CPMG dispersion data for residues in loop1,  $\beta$ -4, and loop 4 for (left) WT and (right) H48C-4MI at pH = 7.0 and 298K

Figure S4.

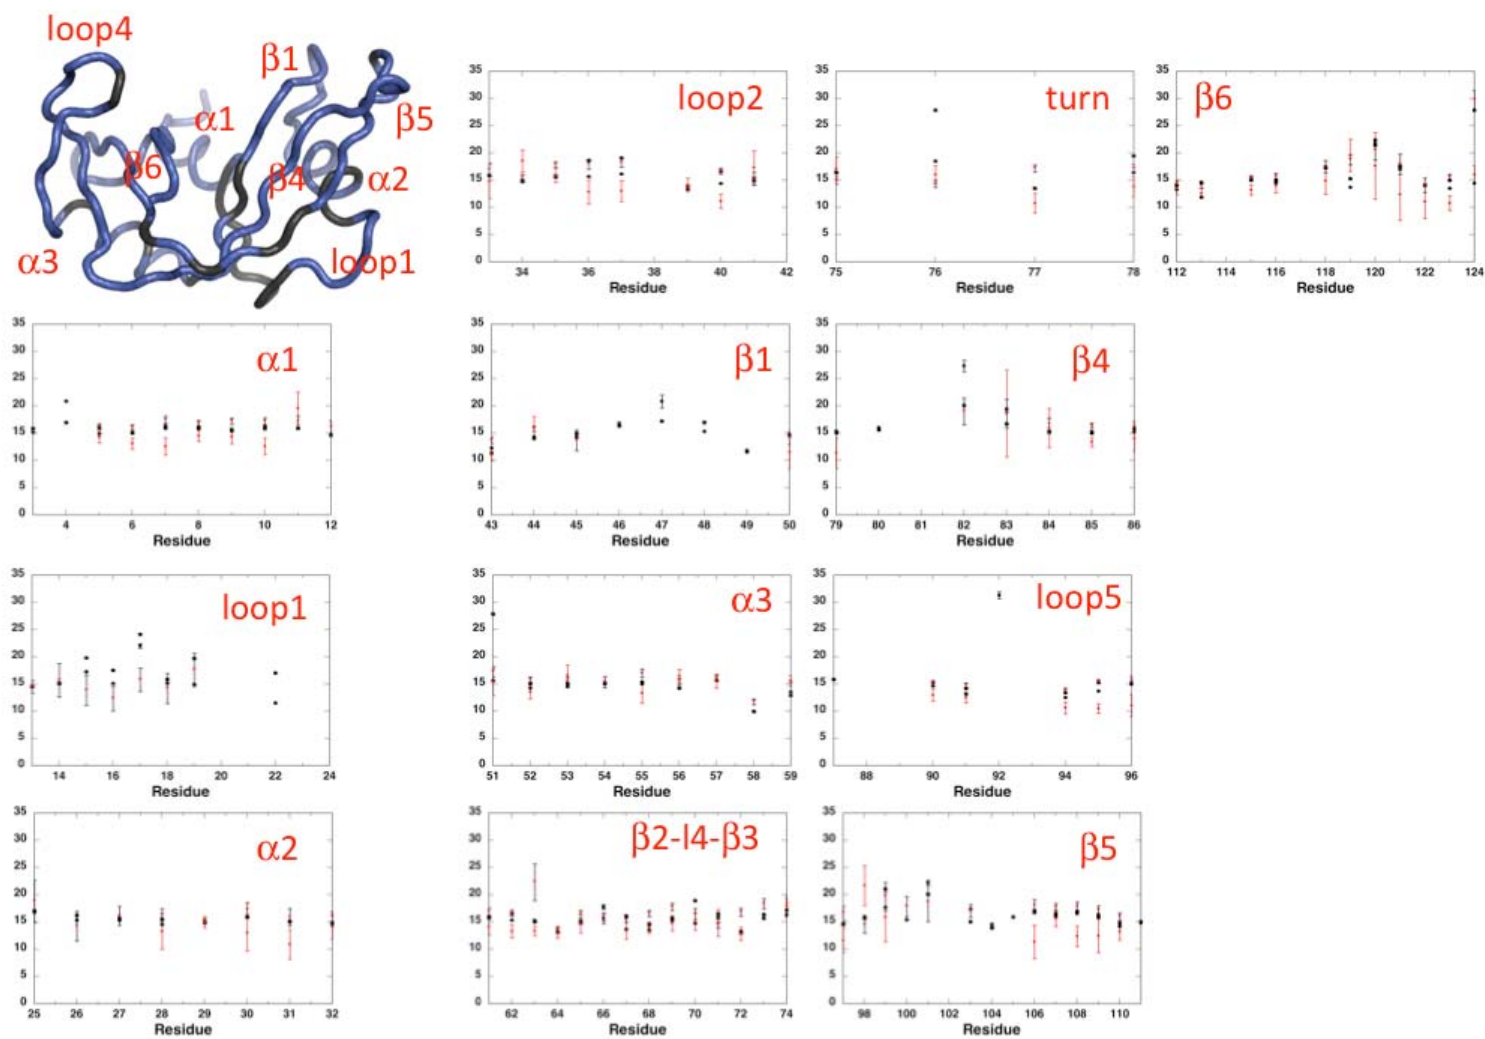

**Figure S4.**  $R_2$  values grouped by secondary structure element and mapped onto ribbon cartoon of RNase A. Black symbols are WT at pH = 6.4 and red symbols are H48C-4MI at pH =6.4. Black portions of the ribbon indicate residues that are exchange broadened in H48C-4MI. Data for both sets was acquired at 298 K and 14.1T.  $R_2$  values were determined in a relaxation compensated CPMG with  $\tau_{cp} = 0.3125$  ms. **All data were obtained on  $^1\text{H}, ^{15}\text{N}$ -labeled RNase A.**



Figure S5.

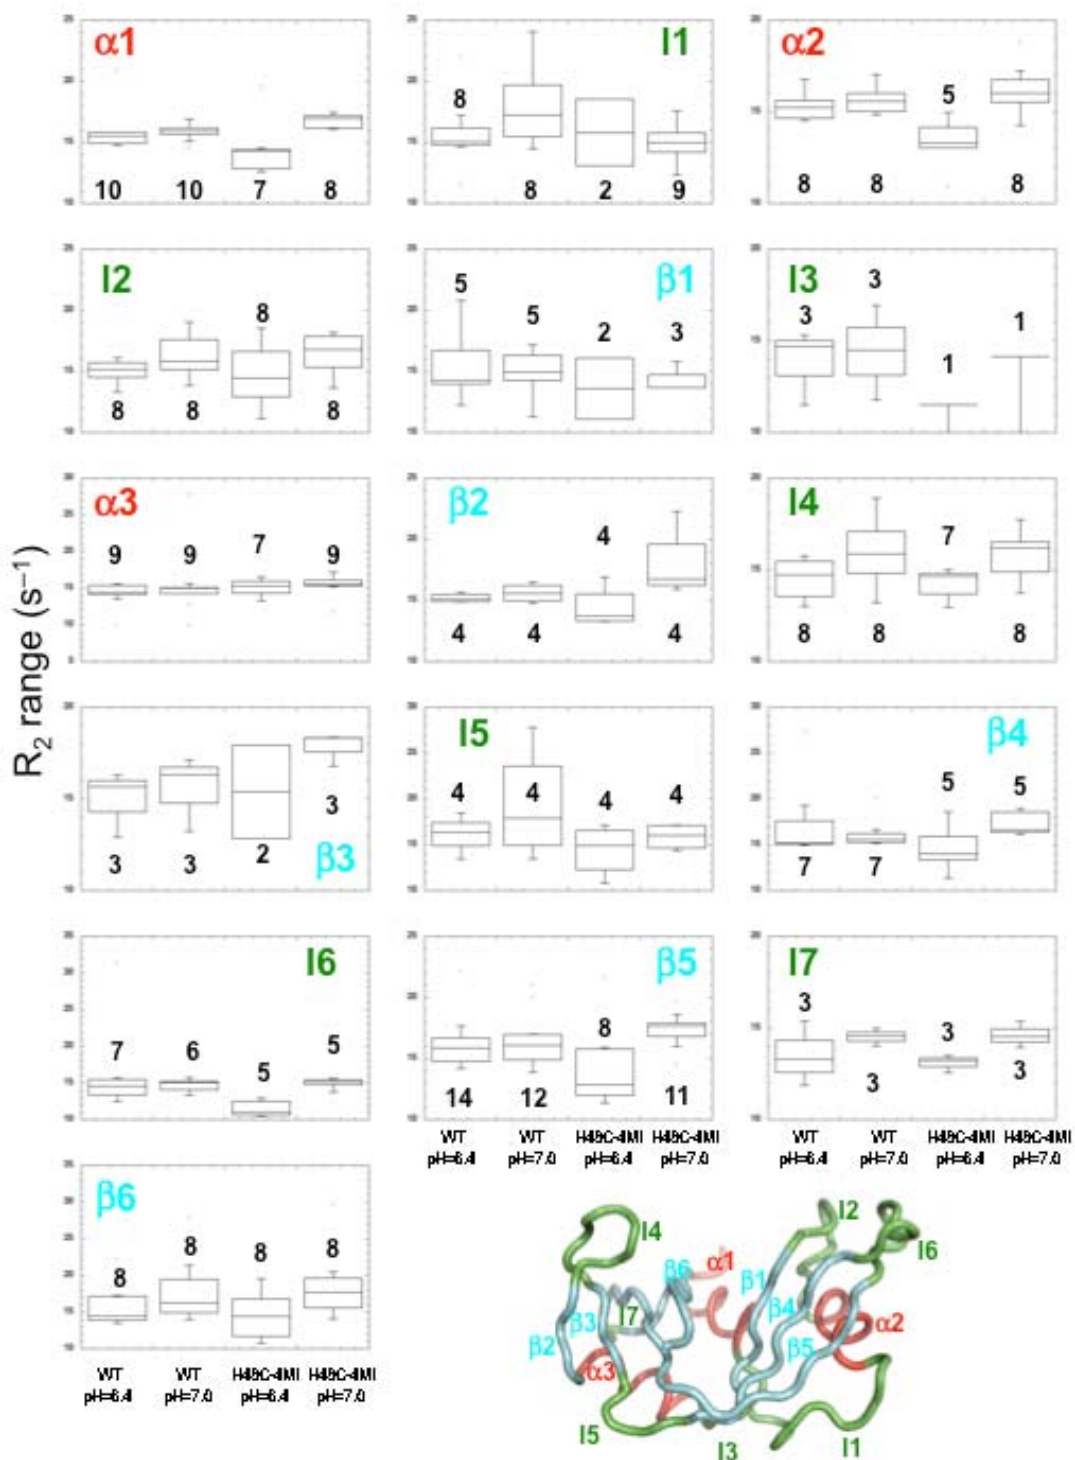

**Figure S5.** Box plots of  $R_2$  values grouped by secondary structure. The range of measured  $R_2$  values is shown in box plot format for WT and H48C-4MI at pH = 6.4 and 7.0. In the box plots

the center horizontal line represents the median value and the upper and lower parts of the box are represent the 75<sup>th</sup> and 25<sup>th</sup> percentiles. The ends of the whiskers are the upper and lower data points and the small circles represent outlier data points. Regions of secondary structure are color-coded cyan ( $\beta$ -strand), red ( $\alpha$ -helix), and green (loops and turns). The numbers near each box indicate the number of residues used for each plot. The similarity in R<sub>2</sub> values between WT and H48C-4MI is evident in this type of representation. Data for both sets was acquired at 298 K and 14.1T. R<sub>2</sub> values were determined in a relaxation compensated CPMG with  $\tau_{cp} = 0.3125$  ms. All data were obtained on <sup>1</sup>H, <sup>15</sup>N-labeled RNase A.

**Figure S6.**

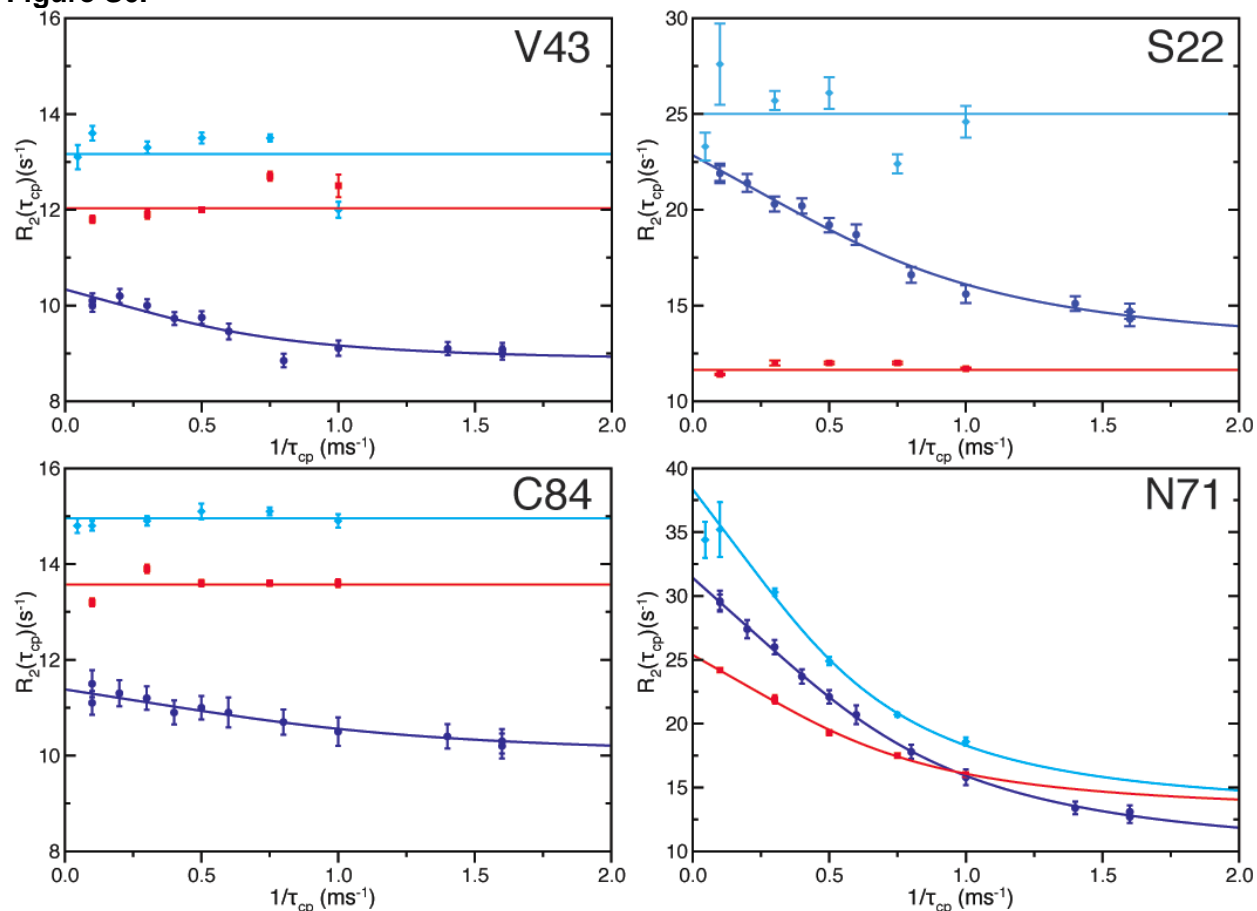

**Figure S6.** pH dependence of conformational exchange in WT RNase A. pH 7.5 (cyan), pH 4.5 (red), and pH 6.4 (blue). The residues represent  $\beta 1$  (V43),  $\beta 4$  (C84), loop 1 (S22), and loop 4 (N71). The dispersion curves at pH 6.4 were obtained on 98% deuterated  $^{15}N$  enzyme. All other data was obtained for protonated protein.

**Figure S7.**

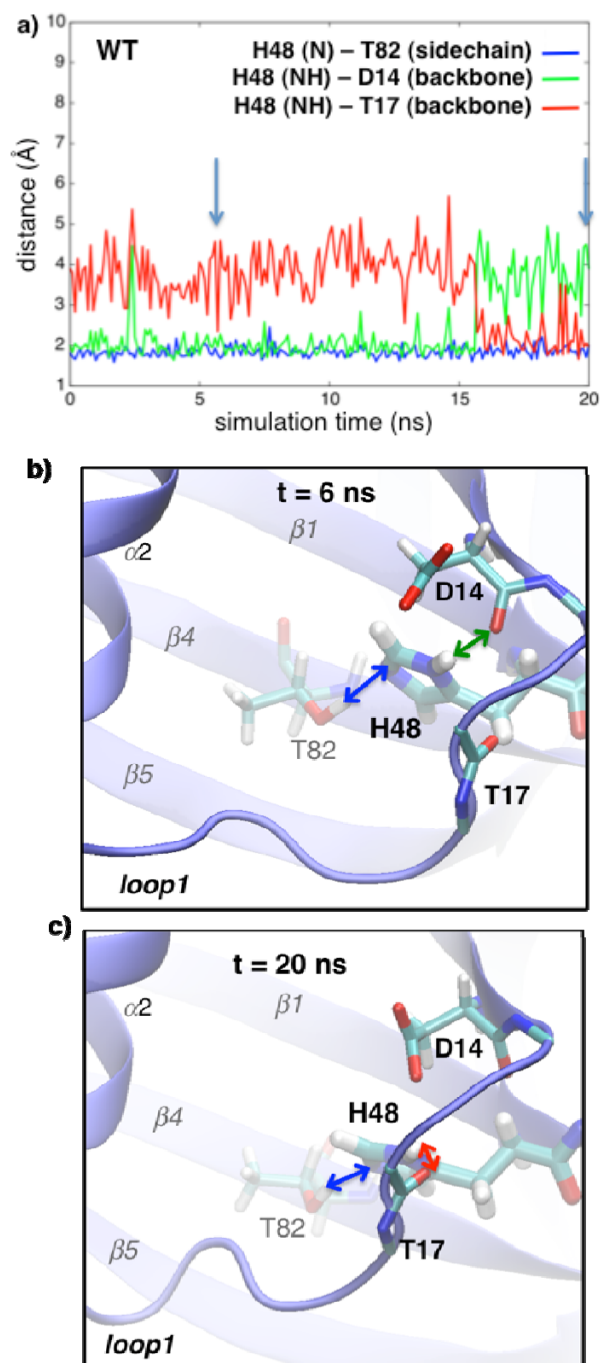

**Figure S7.** Panel a: Time-dependent bond lengths for hydrogen-bonds of the imidazole ring of H48 with loop 1 (D14 and T17) and  $\beta$ -strand 4 (T82), as observed during a 20 ns MD simulation of WT Ribonuclease A. Panel (b): Snapshot configuration at 6 ns (indicate by arrow in panel (a)) showing H-bond interactions between H48 and both T82 and D14 residues. Panel (c): snapshot at 20 ns where H48 forms a H-bond with the backbone carbonyl of T17.

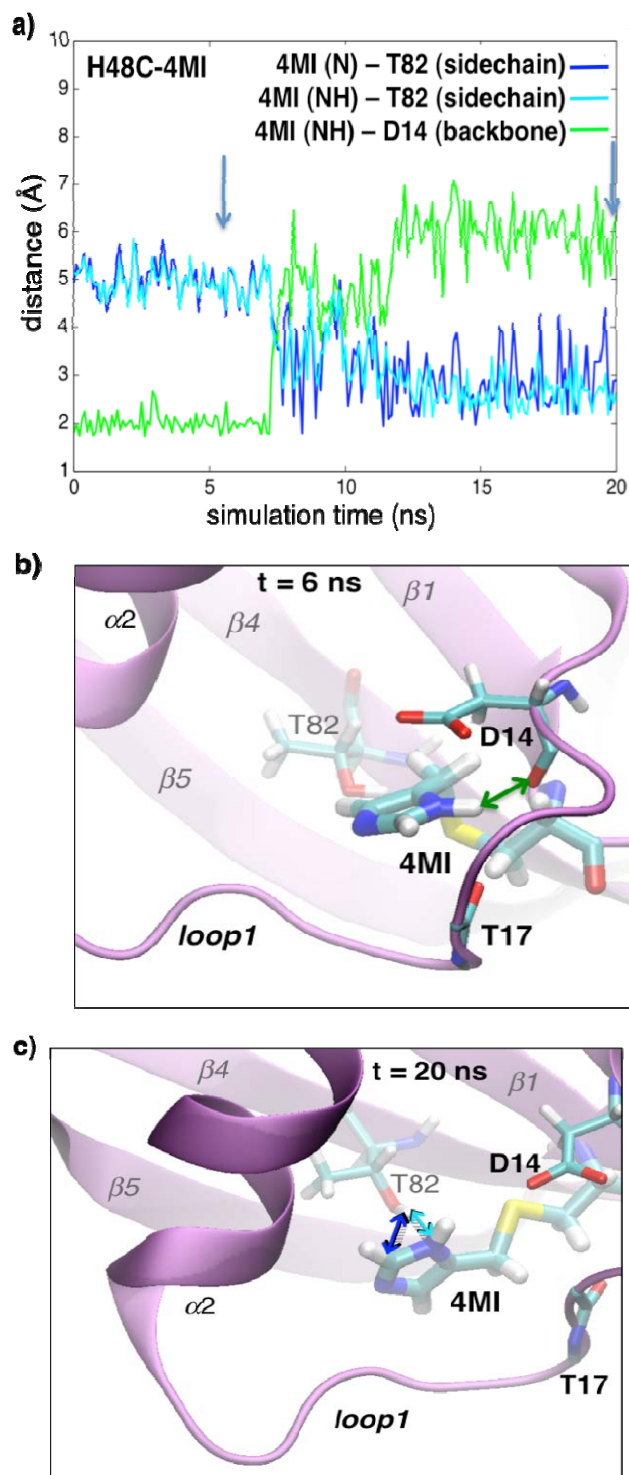

**Figure S8.** Panel a: Time-dependent bond lengths for hydrogen-bonds of the imidazole ring of 4MI to loop 1 (D14) and  $\beta$ -strand 4 (T82), as observed during a 20 ns MD simulation of H48C-4MI RNase A. Panel (b): Snapshot configuration at 6 ns (indicated by arrow in panel (a)), showing H-bond interactions between 4MI and D14. Panel (c): snapshot at 20 ns, where 4MI forms a H-bond with T82.

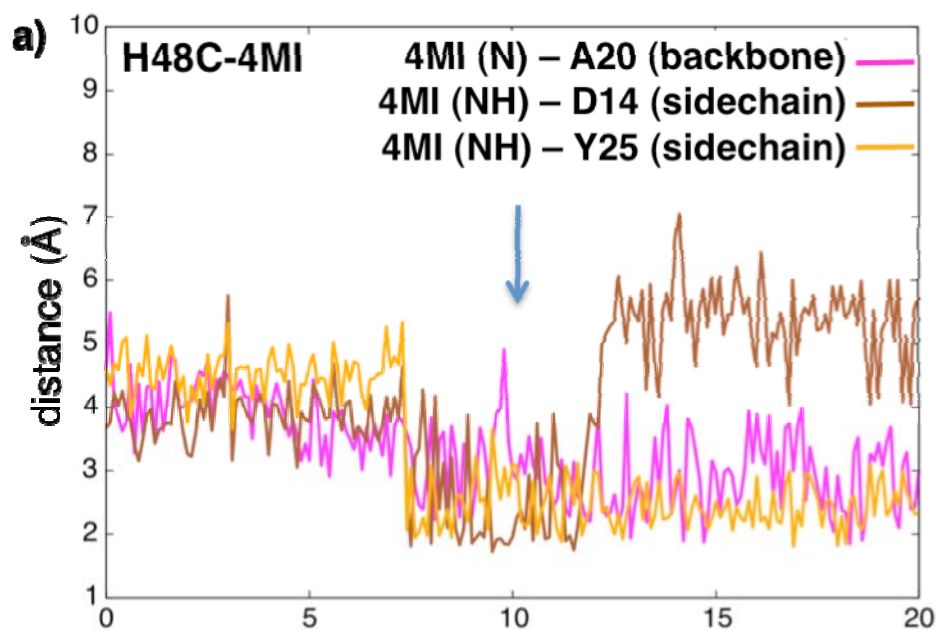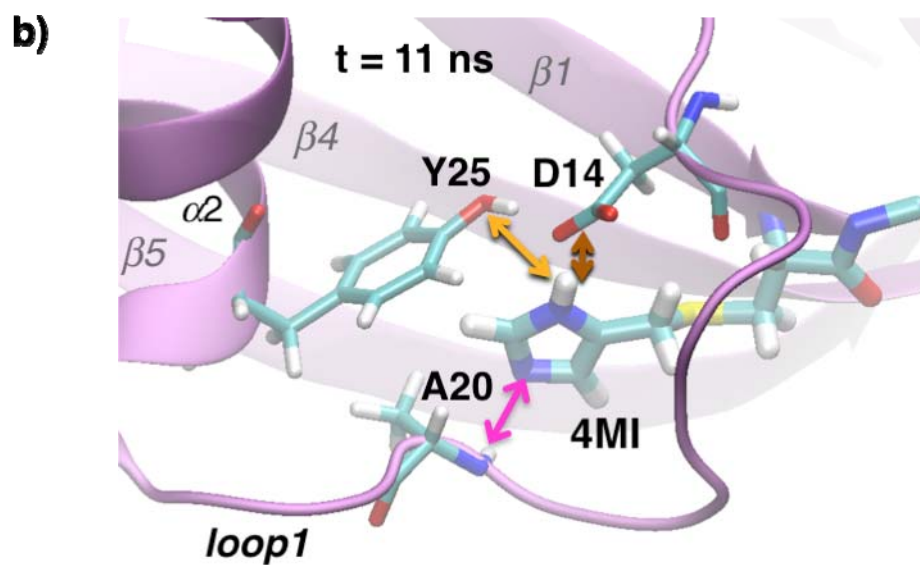

**Figure S9.** Panel a: Time-dependent bond lengths for hydrogen-bonds of the imidazole ring of 4MI and loop 1 (D14, A20) and  $\alpha 2$  (Y25), as observed during a 20 ns MD simulation of H48C-4MI Ribonuclease A. Panel (b): Snapshot configuration at 11 ns (indicate by arrow in panel (a)), showing H-bond interactions between 4MI and D14, Y25 and A20.

## Conformational Exchange in H48G

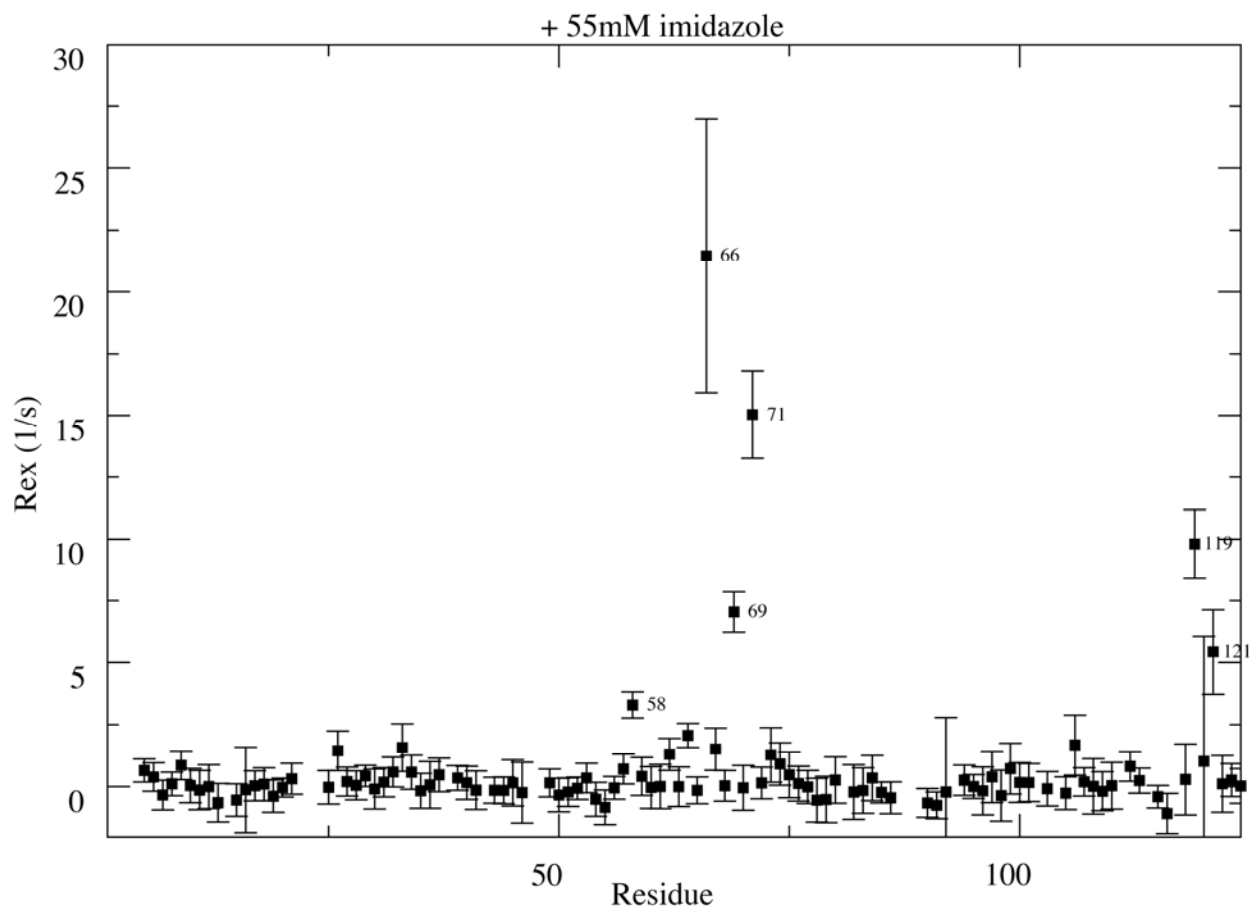

**Figure S10.** Conformational exchange measurements in H48G + 55 mM imidazole.  $R_{ex}$  was measured as the difference in relaxation rates in a CPMG dispersion experiment with  $\tau_{cp} = 0.625$  ms and  $\tau_{cp} = 10$  ms. Data was obtained at pH = 6.4, T = 298 K, 11.7 T.
